# Supplementary material for: Interpretation of COVID-19 Epidemiological Trends in Mexico Through Wastewater Surveillance Using Simple Machine Learning Algorithms for Rapid Decision-Making
Source: Preprints.org preprint supplement (doi:10.20944/preprints202410.1297.v1), 2024-10-17
Supplement: Supplementary file 1 [file supplementary]

## Sheet: TABLE S1
Ciudad	Población	Semana	Max_Campus	WBE_Dato	% Ed Muestreados	% Ed Positivos	Retail_Recreation	Grocery_Pharmacy	Parks	Public_transport	Workplaces	Residential	AVG_Mobility	Casos diarios	Ola	Pred_1_S	Pred_2_S
MTY	5322117	3	2.16427e+06	#N/A	0.659574	0.4194	-40.8571	-14.4286	-54.8571	-45.7143	-27.2857	13.4286	-28.2857	811.857	1	1	1
MTY	5322117	4	#N/A	#N/A	0	#DIV/0!	-40.1429	-14.4286	-51	-45.7143	-27.8571	12.4286	-27.7857	817.571	1	1	1
MTY	5322117	5	#N/A	#N/A	0	#DIV/0!	-37.2857	-10.4286	-46	-43.7143	-25.7143	11.4286	-25.2857	659	1	1	1
MTY	5322117	6	56445.3	0	0.0425532	0.5	-37.4286	-10.2857	-45.7143	-45.4286	-29.8571	11.7143	-26.1667	373.714	1	1	1
MTY	5322117	7	0	0	0.0425532	0	-37	-11.1429	-51	-44	-24.5714	11.5714	-26.0238	301.286	1	0	1
MTY	5322117	8	#N/A	464466	0	#DIV/0!	-38.5714	-12.2857	-55.1429	-47.4286	-29.4286	11.1429	-28.619	170.571	0	1	1
MTY	5322117	9	334476	12302.9	0.170213	0.5	-31	-6	-41.5714	-38.5714	-20.4286	9	-21.4286	202.429	1	0	0
MTY	5322117	10	42285.7	202267	0.170213	0.5	-27	0.714286	-40.1429	-34.7143	-18.5714	8.14286	-18.5952	164.857	0	0	0
MTY	5322117	11	0	13272	0.170213	0	-26.8571	-0.142857	-38.2857	-33.2857	-18.8571	8.57143	-18.1429	136.714	0	0	0
MTY	5322117	12	0	5454.48	0.170213	0	-23.8571	3.28571	-31.8571	-32.1429	-22.4286	8.28571	-16.4524	98.1429	0	0	0
MTY	5322117	13	0	6355.05	0.170213	0	-23.7143	3.28571	-31.7143	-28.4286	-15.4286	7.14286	-14.8095	78.5714	0	0	0
MTY	5322117	14	0	4506.67	0.12766	0	-24.4286	5.57143	-37.5714	-33.7143	-29.8571	9.14286	-18.4762	73.2857	0	0	0
MTY	5322117	15	6981.71	6121.9	0.170213	0.125	-22.7143	5	-31.5714	-26.5714	-17.4286	6	-14.5476	83.2857	0	0	0
MTY	5322117	16	3428.57	5299.05	0.170213	0.125	-18.2857	8.85714	-28	-25.2857	-14.1429	6.28571	-11.7619	76.8571	0	0	0
MTY	5322117	17	2285.71	13771.4	0.170213	0.125	-18.2857	9.28571	-30.5714	-24.4286	-12.8571	6.71429	-11.6905	65	0	0	0
MTY	5322117	18	0	14201.9	0.170213	0	-14.2857	14	-27.1429	-22.1429	-15.7143	5.85714	-9.90476	61	0	0	0
MTY	5322117	19	0	20788.6	0.170213	0	-13.1429	15.5714	-25	-20.1429	-11.8571	5.57143	-8.16667	74.5714	0	0	0
MTY	5322117	20	5304	6982.86	0.170213	0.25	-10.2857	17.4286	-31.1429	-19.7143	-11.2857	5.57143	-8.2381	69.8571	0	0	0
MTY	5322117	21	7843.81	17249.5	0.170213	0.625	-11.7143	18	-25.1429	-16.5714	-9.42857	5.85714	-6.5	80.5714	0	0	0
MTY	5322117	22	0	0	0.191489	0	-10.5714	19.2857	-19.7143	-14.2857	-8.28571	5.71429	-4.64286	91.7143	0	0	0
MTY	5322117	23	1659.05	0	0.191489	0.2222	-7.85714	23.1429	-19.7143	-13	-7.71429	6.14286	-3.16667	91	0	0	0
MTY	5322117	24	0	109101	0.191489	0	-8	22	-17.4286	-13	-7.42857	5.28571	-3.09524	101.714	0	0	0
MTY	5322117	25	0	0	0.170213	0	-6	24.1429	-21.1429	-10.8571	-8.57143	4.57143	-2.97619	100	0	0	0
MTY	5322117	26	0	#N/A	0.170213	0	-10.4286	18.5714	-26	-13.8571	-9.42857	5.14286	-6	126.429	0	0	1
MTY	5322117	27	0	10617.1	0.191489	0	-5.85714	23.4286	-24	-10.7143	-8.57143	4.42857	-3.54762	190.286	0	1	1
MTY	5322117	28	0	0	0.191489	0	-8.57143	21.4286	-25.8571	-10.8571	-8.57143	6	-4.40476	295.571	1	1	1
MTY	5322117	29	0	15173.3	0.191489	0	-6.14286	25.1429	-18.8571	-8.85714	-8.71429	5.42857	-2	502.571	1	1	1
MTY	5322117	30	183474	#N/A	0.191489	0.1111	-8.57143	22.5714	-22	-8.42857	-10.4286	6.28571	-3.42857	717.143	1	1	1
MTY	5322117	31	0	8404.29	0.191489	0	-8.71429	24.2857	-22.5714	-10.2857	-11.2857	6.42857	-3.69048	986.429	1	1	1
MTY	5322117	32	147501	5537.14	0.212766	0.2	-10.1429	22.7143	-24.7143	-11.1429	-11.2857	7.71429	-4.47619	1261.29	1	1	1
MTY	5322117	33	20083.8	#N/A	0.531915	0.12	-12.2857	21.8571	-24.4286	-13.7143	-11.5714	8	-5.35714	1418.14	1	1	1
MTY	5322117	34	435627	16960	0.638298	0.2333	-13.2857	20.5714	-30.1429	-16.8571	-11.7143	8.71429	-7.11905	1300.71	1	1	1
MTY	5322117	35	111493	39874.3	0.638298	0.2667	-14	18.5714	-29.5714	-17.4286	-10.7143	8.42857	-7.45238	1072.57	1	1	1
MTY	5322117	36	75539	213887	0.638298	0.1667	-9.42857	23.5714	-27.7143	-15.5714	-10.1429	7.71429	-5.2619	837.143	1	1	1
MTY	5322117	37	852739	131970	0.638298	0.1333	-11.4286	19.5714	-26.7143	-15.4286	-9.42857	7.85714	-5.92857	635	1	1	1
MTY	5322117	38	3960	4110	0.680851	0.0938	-9.57143	23.1429	-24.7143	-17.4286	-17	8.42857	-6.19048	443.857	1	1	1
MTY	5322117	39	278379	54282.9	0.702128	0.1515	-11.2857	19	-23.7143	-12.2857	-8.28571	7.28571	-4.88095	385	1	1	1
MTY	5322117	40	18167.1	#N/A	0.702128	0.0606	-7.14286	22.1429	-22.4286	-10	-6.28571	6.57143	-2.85714	335.429	1	1	1
MTY	5322117	41	13341.4	#N/A	0.680851	0.25	-5.28571	22.4286	-18.5714	-8	-6.57143	6.14286	-1.64286	268.571	1	1	1
MTY	5322117	42	14048.6	95468.6	0.680851	0.0625	-5.28571	23.2857	-19.8571	-5.28571	-6.14286	6.14286	-1.19048	245.429	1	1	1
MTY	5322117	43	3.50855e+06	61821.4	0.702128	0.1515	-3.14286	24.8571	-12.1429	-1.85714	-4.57143	5.57143	1.45238	212.286	1	0	0
MTY	5322117	44	1.43802e+06	18282.9	0.702128	0.3939	-0.857143	30.1429	-11.1429	0.142857	-4.14286	4.57143	3.11905	171.714	0	0	0
MTY	5322117	45	56957.1	25238.6	0.702128	0.1515	-1.28571	30	-13.4286	-2.71429	-5.28571	5.28571	2.09524	129.429	0	0	0
MTY	5322117	46	2070	0	0.702128	0.0606	1.14286	29.1429	-11.7143	1.42857	-2.42857	4.71429	3.71429	142.857	0	0	0
MTY	5322117	47	0	0	0.680851	0	4.57143	31.4286	-11.8571	1.57143	-9	5.57143	3.71429	112	0	0	0
MTY	5322117	48	17327.1	21291.4	0.680851	0.0625	-1	28.1429	-16.4286	0	-0.428571	5	2.54762	103.714	0	0	0
MTY	5322117	49	9587.14	#N/A	0.680851	0.125	5.71429	35.5714	-9	6	1.42857	3.42857	7.19048	105.286	0	0	0
MTY	5322117	50	57222.9	#N/A	0.680851	0.0938	8.57143	36.5714	-5.42857	9	5.28571	2.42857	9.40476	86	0	0	0
MTY	5322117	51	#N/A	576424	0	#DIV/0!	21.1429	42.4286	-6.57143	17.4286	7.42857	1.28571	13.8571	83	0	0	1
MTY	5322117	52	#N/A	#N/A	0	#DIV/0!	12.2857	40.7143	-15.8571	5.14286	-17.1429	3.42857	4.7619	98.5714	0	1	1
MTY	5322117	53	#N/A	88778.6	0	#DIV/0!	-4.85714	27.2857	-18.1429	-10.5714	-28.1429	7.57143	-4.47619	420.143	1	1	1
MTY	5322117	54	#N/A	399304	0	#DIV/0!	-8	27.1429	-25.7143	-3	-5	8.28571	-1.04762	1576.43	1	1	1
MTY	5322117	55	#N/A	864090	0	#DIV/0!	-12.4286	25.7143	-29.4286	-11.4286	-3.57143	10.8571	-3.38095	4002.29	1	1	1
MTY	5322117	56	1.72047e+06	383190	0.638298	0.5667	-13.1429	22.8571	-32.8571	-15.1429	-7.14286	12.5714	-5.47619	4193.86	1	1	1
MTY	5322117	57	#N/A	160744	0	#DIV/0!	-12.4286	19.2857	-36.5714	-14.8571	-4.42857	11.8571	-6.19048	2620.29	1	1	1
MTY	5322117	58	#N/A	#N/A	0	#DIV/0!	-4.14286	27.2857	-21.8571	-5.42857	1	8.57143	0.904762	1235.29	1	1	1
MTY	5322117	59	#N/A	#N/A	0	#DIV/0!	-2.57143	26.2857	-19.7143	-4.42857	-4.42857	8.71429	0.642857	455.571	1	1	1
MTY	5322117	60	#N/A	#N/A	0	#DIV/0!	6.85714	36.1429	-9	8.71429	8.57143	4	9.21429	256.286	1	0	0
MTY	5322117	61	#N/A	#N/A	0	#DIV/0!	0.857143	30.4286	-11.5714	7.85714	9	4.28571	6.80952	148.429	0	0	0
MTY	5322117	62	#N/A	#N/A	0	#DIV/0!	6.14286	36.8571	-3.42857	13.1429	11.4286	2.57143	11.119	78.8571	0	0	0
MTY	5322117	63	319020	0	0.638298	0.3333	1.57143	30.7143	-5.42857	10.8571	12.4286	3.57143	8.95238	39.7143	0	0	0
MTY	5322117	64	331916	0	0.638298	0.0667	4	35.7143	-1.85714	16	13.8571	2.57143	11.7143	39.1429	0	0	0
MTY	5322117	65	80588.6	0	0.702128	0.1515	1	30	1.28571	11.8571	3.42857	4.14286	8.61905	29	0	0	0
MTY	5322117	66	15278.6	0	0.680851	0.0625	2.71429	34.7143	9.57143	18.8571	16.4286	2.14286	14.0714	22	0	0	0
MTY	5322117	67	1508.57	0	0.702128	0.0909	4	35.1429	0.142857	19.4286	15.7143	2.14286	12.7619	14	0	0	0
MTY	5322117	68	#N/A	#N/A	0	#DIV/0!	0.571429	31.7143	2.57143	-1.57143	-17.8571	5.57143	3.5	10.2857	0	0	0
MTY	5322117	69	0	0	0.617021	0	-0.285714	27	-5.71429	7.42857	1.14286	3.85714	5.57143	9.42857	0	0	0
MTY	5322117	70	0	0	0.702128	0	7.14286	37.7143	1	19.5714	16.8571	2	14.0476	9	0	0	0
MTY	5322117	71	4680	0	0.638298	0.0333	10.5714	39.8571	-0.142857	17.1429	14	2	13.9048	15.8571	0	0	0
MTY	5322117	72	#N/A	0	0	#DIV/0!	13.7143	42.1429	-3	17.7143	15.5714	1	14.5238	35.1429	0	0	0
MTY	5322117	73	14254.3	0	0.702128	0.1818	8	40.7143	-1.42857	19.8571	15.7143	1.85714	14.119	54.1429	0	0	1
MTY	5322117	74	551897	0	0.659574	0.4839	5.28571	36.1429	-6.57143	14.7143	13	3.14286	10.9524	131.714	0	1	1
MTY	5322117	75	1.01284e+06	0	0.680851	0.6875	10	42.8571	-2.42857	14.2857	13.7143	2.28571	13.4524	210	1	1	1
MTY	5322117	76	623511	0	0.659574	0.1613	7.42857	40	-1.57143	12.7143	13	2.85714	12.4048	345.429	1	1	1
MTY	5322117	77	450716	0	0.680851	0.7188	10	43	-0.142857	13.4286	12.4286	2.71429	13.5714	530.571	1	1	1
MTY	5322117	78	32237.1	16094.1	0.659574	0.3226	6.14286	40	0.428571	11.8571	11.2857	3.28571	12.1667	619	1	0	0
CDMX	21804515	7	293437	#N/A	0.5	0.166667	-46.4286	-11.8571	-48	-43.4286	-33	15.7143	-27.8333	2577.29	1	1	1
CDMX	21804515	8	52190	#N/A	0.5	0.333333	-42	-7.28571	-44.2857	-39.5714	-30.5714	14.7143	-24.8333	2157.86	1	1	1
CDMX	21804515	9	44190	#N/A	0.5	0.166667	-41.5714	-6.42857	-43.1429	-38.1429	-29.4286	14.2857	-24.0714	2195.29	1	1	1
CDMX	21804515	10	3429	#N/A	0.5	0.166667	-39.4286	-3.28571	-41.7143	-35.8571	-28.7143	13.7143	-22.5476	2081.43	1	1	1
CDMX	21804515	11	153524	#N/A	0.5	0.166667	-38.7143	-3.71429	-40	-34.5714	-28.2857	13.7143	-21.9286	1679.57	1	1	1
CDMX	21804515	12	0	#N/A	0.5	0	-38.1429	-3	-39.4286	-35	-30.7143	13.8571	-22.0714	1402.86	1	1	1
CDMX	21804515	13	19810	#N/A	0.5	0.166667	-36.8571	-2.28571	-37.8571	-31.8571	-26	13	-20.3095	1374.29	1	0	1
CDMX	21804515	14	0	#N/A	0	0	-37.5714	-1.57143	-39.8571	-37.7143	-36.7143	13.5714	-23.3095	914.714	0	1	1
CDMX	21804515	15	0	#N/A	0.5	0	-37	-2.57143	-39.2857	-31.5714	-26.2857	12.2857	-20.7381	1166.14	1	1	1
CDMX	21804515	16	0	#N/A	0.5	0	-34.2857	0.571429	-36.5714	-29.8571	-24.1429	12.4286	-18.6429	1001.86	1	0	0
CDMX	21804515	17	0	#N/A	0.5	0	-33.4286	1.42857	-34.7143	-28.2857	-23	12.4286	-17.5952	854	0	0	0
CDMX	21804515	18	0	#N/A	0.5	0	-30.7143	4.85714	-34.5714	-27.1429	-24.1429	11.8571	-16.6429	694.429	0	0	0
CDMX	21804515	19	0	#N/A	0.5	0	-29	6.85714	-33.5714	-25.1429	-22	11.2857	-15.2619	560.571	0	0	0
CDMX	21804515	20	0	#N/A	0.5	0	-27.2857	8	-34.7143	-23.7143	-21.4286	11	-14.6905	457	0	0	0
CDMX	21804515	21	0	#N/A	0.5	0	-26	10.2857	-29.8571	-20.4286	-18.5714	11.1429	-12.2381	476.286	0	0	0
CDMX	21804515	22	0	#N/A	0.5	0	-25	9.42857	-28.5714	-20	-17.2857	11	-11.7381	511.143	0	0	0
CDMX	21804515	23	0	5721.3	0.5	0	-22.4286	13.1429	-28	-18.5714	-16.2857	11.1429	-10.1667	525.857	0	0	0
CDMX	21804515	24	0	754.38	0.5	0	-22.8571	13.1429	-28.1429	-17.8571	-15.4286	11.1429	-10	683.857	0	0	1
CDMX	21804515	25	0	5375.61	0.5	0	-21.8571	13.1429	-30.4286	-17.1429	-16.5714	10.2857	-10.4286	836	0	1	1
CDMX	21804515	26	0	#N/A	0.5	0	-23.7143	9.28571	-29.7143	-18.8571	-16.8571	10.2857	-11.5952	1250.57	1	1	1
CDMX	21804515	27	0	#N/A	0.5	0	-22.5714	11.4286	-34	-18.4286	-17.1429	10.2857	-11.7381	1748.86	1	1	1
CDMX	21804515	28	0	#N/A	0.5	0	-21	14	-26.8571	-16.2857	-16.4286	10.7143	-9.30952	2779	1	1	1
CDMX	21804515	29	0	#N/A	0.5	0	-21.1429	15.2857	-25.2857	-16.7143	-16.5714	10.4286	-9	3682.86	1	1	1
CDMX	21804515	30	0	#N/A	0.5	0	-21.8571	13.4286	-26.4286	-18	-17.8571	11.1429	-9.92857	4307.43	1	1	1
CDMX	21804515	31	317714	20734	0.5	0.166667	-22.5714	12.5714	-29.7143	-18.5714	-17.8571	11.5714	-10.7619	4544.29	1	1	1
CDMX	21804515	32	5448	19267.2	0.5	0.333333	-21.4286	15	-28.1429	-18.1429	-16.7143	11.4286	-9.66667	4325.29	1	1	1
CDMX	21804515	33	838	#N/A	0.5	0.166667	-22	13.7143	-27.7143	-18.5714	-17.1429	11.7143	-10	4083.57	1	1	1
CDMX	21804515	34	0	#N/A	0.5	0	-21.8571	14.4286	-26.5714	-19.5714	-16.4286	11.8571	-9.69048	3219.71	1	1	1
CDMX	21804515	35	215486	#N/A	0.666667	0.166667	-21	14.1429	-25.2857	-18	-14.5714	11.4286	-8.88095	2738.14	1	1	1
CDMX	21804515	36	1320896	#N/A	0.666667	0.5	-19.1429	17.5714	-30	-16.4286	-13.4286	11	-8.40476	2182.71	1	1	1
CDMX	21804515	37	18995	#N/A	1	0.5	-19.7143	16.1429	-27.7143	-15.5714	-12.8571	10.7143	-8.16667	1768.57	1	1	1
CDMX	21804515	38	58663	#N/A	1	0.666667	-21.2857	16.7143	-26	-20	-21	10.8571	-10.119	1363.71	1	1	1
CDMX	21804515	39	14966	#N/A	1	0.333333	-18.4286	16.8571	-22.8571	-13.7143	-11.2857	10	-6.57143	1481	1	0	0
CDMX	21804515	40	10213	#N/A	1	0.166667	-16.7143	19	-23	-11.7143	-10.7143	9.42857	-5.61905	980.714	0	0	0
CDMX	21804515	41	46110	#N/A	1	0.333333	-15.8571	19.2857	-21.7143	-11.5714	-9.42857	9.14286	-5.02381	767.429	0	0	0
CDMX	21804515	42	0	#N/A	1	0	-13.2857	22	-14.4286	-9.85714	-8.14286	8.28571	-2.57143	624.571	0	0	0
CDMX	21804515	43	0	#N/A	1	0	-13	22.7143	-16.2857	-7.57143	-8	8.14286	-2.33333	533.429	0	0	0
CDMX	21804515	44	38511	#N/A	1	0.666667	-10.8571	28.5714	-10.5714	-3.57143	-7.71429	7	0.47619	443.429	0	0	0
CDMX	21804515	45	18120	#N/A	1	0.166667	-9	27.8571	6.85714	-5.57143	-15	7.85714	2.16667	384.143	0	0	0
CDMX	21804515	46	8139	#N/A	1	0.166667	-7.14286	24.7143	-15	-2.42857	-6	7	0.190476	408	0	0	0
CDMX	21804515	47	0	#N/A	1	0	-5.14286	26	-14.7143	-4.85714	-12	8.14286	-0.428571	357.714	0	0	0
CDMX	21804515	48	8970	#N/A	1	0.166667	-8.71429	24.5714	-13.2857	-1.28571	-5.28571	7.14286	0.52381	360.857	0	0	0
CDMX	21804515	49	0	#N/A	1	0	-3	33.1429	-7.14286	3.57143	-4	6.14286	4.78571	323.857	0	0	0
CDMX	21804515	50	0	#N/A	1	0	-2.71429	32.4286	-9.57143	3.85714	-0.714286	5.71429	4.83333	292.143	0	0	0
CDMX	21804515	51	0	#N/A	0	0	6.85714	38.1429	-6.57143	7.71429	0.857143	4.14286	8.52381	341	0	0	1
CDMX	21804515	52	0	#N/A	0	0	-1	35.7143	-12.4286	-4.42857	-21.5714	6	0.380952	676	0	1	1
CDMX	21804515	53	0	#N/A	0	0	-13.2857	21.4286	-20.5714	-17.7143	-30.7143	9	-8.64286	2283.86	1	1	1
CDMX	21804515	54	0	#N/A	0	0	-9.42857	32.5714	-17.7143	-7	-10.7143	9.42857	-0.47619	8049.86	1	1	1
CDMX	21804515	55	33587	#N/A	1	0.5	-17.7143	24.1429	-24.5714	-14	-11	12.5714	-5.09524	13908.7	1	1	1
CDMX	21804515	56	10973151	#N/A	1	0.833333	-18.2857	20.5714	-26.1429	-17.2857	-13.8571	13.2857	-6.95238	13257.6	1	1	1
CDMX	21804515	57	0	#N/A	0	0	-16.2857	20.7143	-20.8571	-15.7143	-9.71429	11.7143	-5.02381	8662.43	1	1	1
CDMX	21804515	58	0	#N/A	0	0	-11.1429	27.1429	-15.1429	-8	-5.57143	9.14286	-0.595238	4703.43	1	1	1
CDMX	21804515	59	0	#N/A	0	0	-12.7143	22.5714	-16.5714	-10.2857	-10	9.71429	-2.88095	2434.43	1	1	1
CDMX	21804515	60	0	#N/A	0	0	-5.42857	28.4286	-11.2857	-0.857143	-0.857143	6.85714	2.80952	1761.14	1	1	1
CDMX	21804515	61	0	#N/A	0	0	-8.42857	25.2857	-9.42857	1.28571	-0.571429	6.14286	2.38095	1113.14	1	0	0
CDMX	21804515	62	0	#N/A	0	0	-8	29.1429	-8.71429	1.14286	1.57143	5.14286	3.38095	653.286	0	0	0
CDMX	21804515	63	76650	#N/A	1	0.5	-11	23.8571	-10.1429	-0.428571	2.57143	5.57143	1.7381	455.714	0	0	0
CDMX	21804515	64	11756	5919	1	0.166667	-11.5714	23.7143	-11.7143	2.28571	4	5	1.95238	344.857	0	0	0
CDMX	21804515	65	0	0	1	0	-13.4286	20.4286	-9.14286	-3.28571	-3.28571	6	-0.452381	255.286	0	0	0
CDMX	21804515	66	0	0	1	0	-11.5714	25.7143	-8.57143	3	7.57143	4.42857	3.42857	250.714	0	0	0
CDMX	21804515	67	0	46968.8	1	0	-11.4286	24.8571	-9.42857	4.71429	7.28571	4.14286	3.35714	189.429	0	0	0
CDMX	21804515	68	0	#N/A	0	0	-15.2857	19	-5.42857	-13.2857	-22.4286	7.85714	-4.92857	134.143	0	0	0
CDMX	21804515	69	0	0	1	0	-14.1429	18	-12.4286	-0.857143	-2.42857	5.71429	-1.02381	179.857	0	0	0
CDMX	21804515	70	5773	0	1	1	-8.85714	26	-8.85714	7.14286	9.42857	3.85714	4.78571	171	0	0	0
CDMX	21804515	71	4410	2079.1	1	1	-6.85714	27.7143	-7.28571	7	6.71429	4.42857	5.28571	189.571	0	0	0
CDMX	21804515	72	0	2095.05	1	0	-5.42857	28.2857	-7.71429	2.57143	6.85714	3.57143	4.69048	271.571	0	0	0
CDMX	21804515	73	0	0	1	0	-8.57143	27.7143	-7	5.71429	10.2857	3.71429	5.30952	388	0	0	0
CDMX	21804515	74	43616	4455.17	1	1	-10.1429	24.4286	-11	4	10.1429	4	3.57143	618.714	0	0	1
CDMX	21804515	75	8087	9498.23	1	0.666667	-8.28571	30.1429	-8	2.57143	10.1429	4.14286	5.11905	955	0	1	1
CDMX	21804515	76	20396	3148.94	1	1	-9.71429	26.1429	-8.42857	3.42857	10.4286	4.85714	4.45238	1626.86	1	1	1
CDMX	21804515	77	522819	36957.3	0.833333	0.833333	-8	28.2857	-10.4286	3.57143	8.14286	5.28571	4.47619	2656	1	1	1
CDMX	21804515	78	17202	2719.38	0.833333	0.5	-10.2857	24.5714	-10.7143	2	6.28571	5.85714	2.95238	4681.57	1	0	0
